# Supplementary material
Source: publisher figshare collection journal article supplement (https://acs.figshare.com/ndownloader/files/3869440)
Supplement: Supplementary file 1 [file 3869440]

**UNIMOLECULAR FRAGMENTATION INDUCED BY LOW ENERGY COLLISION:  
STATISTICAL OR DINAMICALLY DRIVEN?**

Ana Martín-Sómer<sup>1,2</sup>, Manuel Yáñez<sup>1\*</sup>, Marie-Pierre Gaigeot<sup>2,3,4</sup> and Riccardo Spezia<sup>2,3\*</sup>

*Contribution from <sup>1</sup>Departamento de Química, Facultad de Ciencias, Módulo 13. Universidad Autónoma de Madrid. Cantoblanco, 28049-Madrid. Spain, <sup>2</sup>Université d'Evry Val d'Essonne, UMR 8587 LAMBE, Boulevard F. Mitterrand, 91025 Evry Cedex, France, <sup>3</sup>CNRS, Laboratoire Analyse et Modélisation pour la Biologie et l'Environnement UMR 8587, France, and <sup>4</sup>Institut Universitaire de France (IUF).*

**Supporting Information  
(15 pages)**

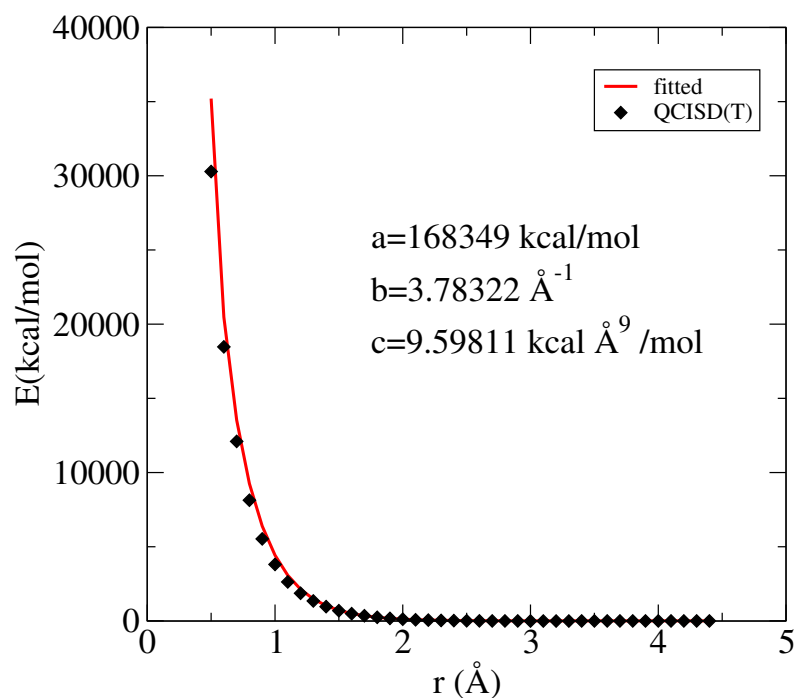

**Figure S1:** QCISD(T)/6-31++G(d,p) *ab initio* (diamonds) and fitted (solid line) potential energy curves for the Ar-Sr<sup>2+</sup> interaction.

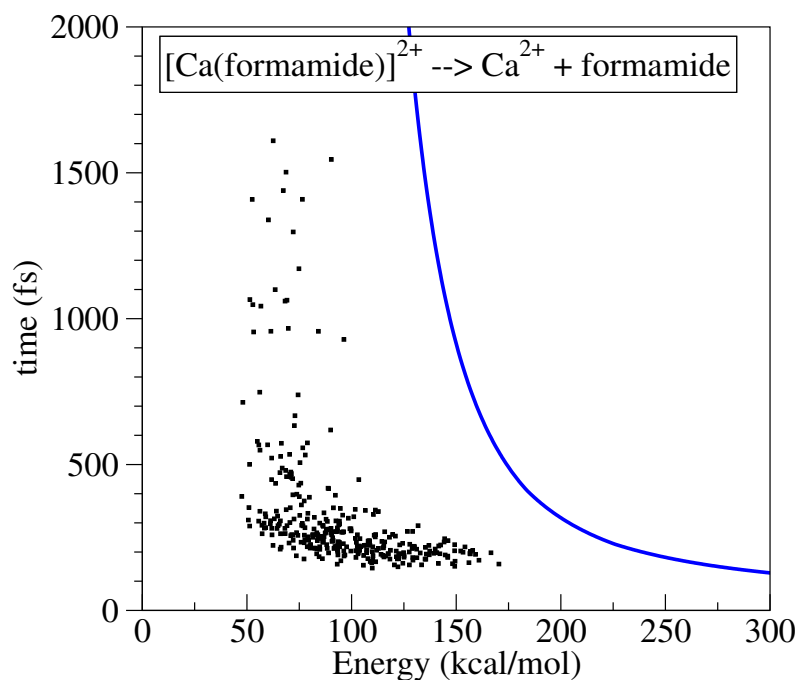

**Figure S2:** Reaction time vs. energy transfer for trajectories yielding formamide neutral loss, obtained from dynamics simulations (squares) and half life times ( $t_{1/2}$ ) predicted by RRKM (solid line). Both were obtained using BLYP/6-31G(d) level of theory.

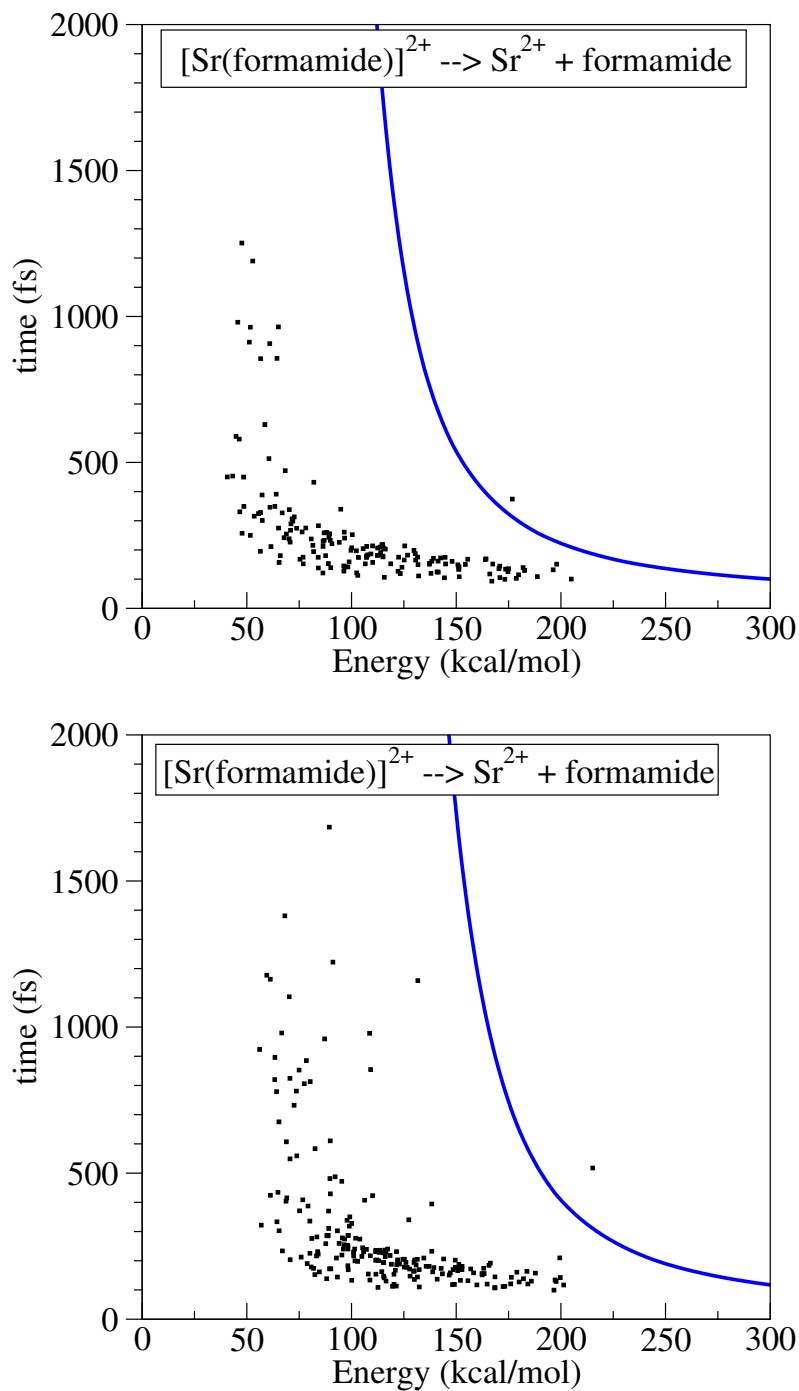

**Figure S3:** Reaction time vs. energy transfer obtained from dynamics simulations (squares) and half life times ( $t_{1/2}$ ) predicted by RRKM (solid line). Both are for trajectories yielding formamide using G96LYP/6-31G(d) in the top and G96LYP/6-31+G(d,p) in the bottom.

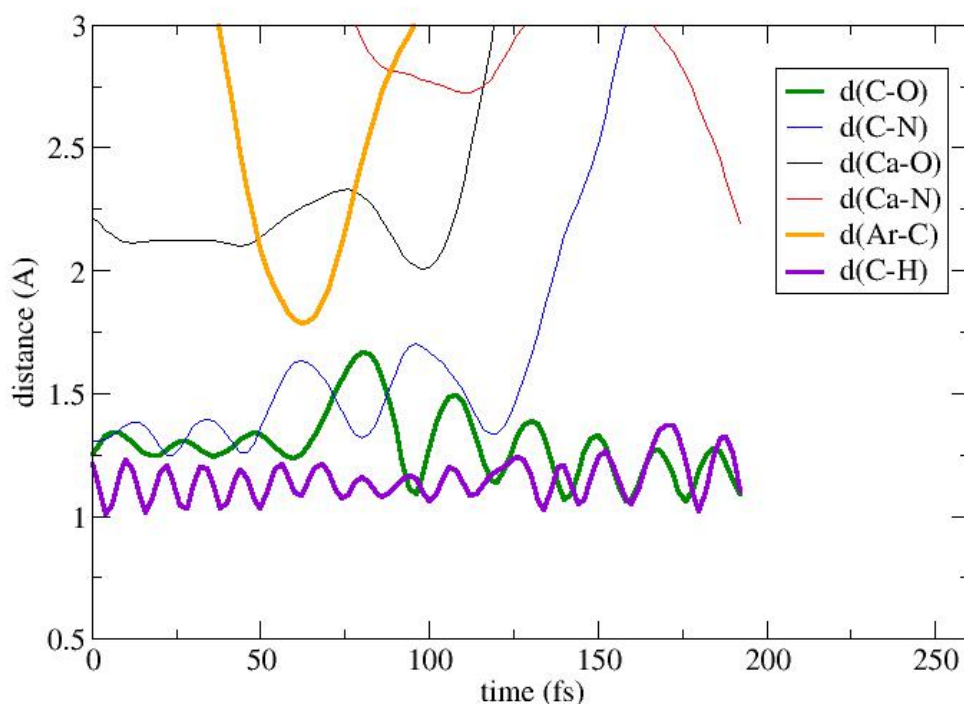

**Figure S4.** Selected distances for a trajectory yielding **G**,  $[\text{Ca}(\text{NH}_2)]^+ + \text{HCO}^+$  Coulomb explosion (the same as Fig. 5a and video jp5076059\_si\_005.mpg). Distances already reported in Fig. 5a are shown as thin lines.

Before Ar approaches to the ion, C=O and C-H distances oscillate with a period of about 20 and 10 fs respectively, and an amplitude corresponding to  $n = 0$  of their respective normal modes ( $1699$  and  $3075 \text{ cm}^{-1}$ , for 20 and 10 fs) (these were extracted from equilibrium structure of  $[\text{Ca}(\text{formamide})]^{2+}$ , min1). After the reaction, these bonds are found in the  $\text{HCO}^+$  product, and their periods are of about 15 and 10 fs. Given the new amplitudes, and new frequencies ( $2173$  (C=O) and  $3181 \text{ cm}^{-1}$  (C-H)), they correspond to  $n = 1$  of both normal modes. Note that during the collision, *i.e.* when Ar is at a distance less than  $3 \text{ \AA}$ , these vibrational modes do not correspond to the frequency of any reference structure (furthermore, no frequency can be identified). Hence, it is not possible to quantify them in terms of vibrational quantum states (or vibrational energies) during collision.

### 3.4. Efficiency of the energy transfer

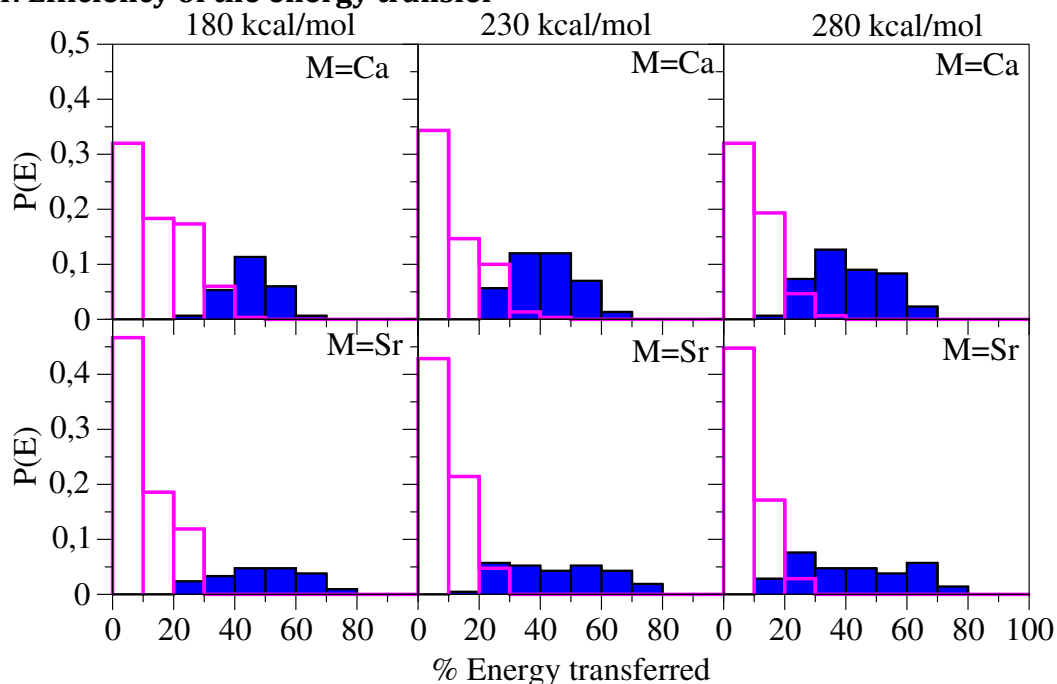

**Figure S5:** Probability of transferring a given % of the collision energy to the  $[M(\text{formamide})]^{2+}$  ion for the non-reactive trajectories (white) and the reactive ones (blue), at the three collision energies considered (180, 230 and 280 kcal mol<sup>-1</sup> from left to right). G96LYP/6-31G(d) is used for the two molecular ions.

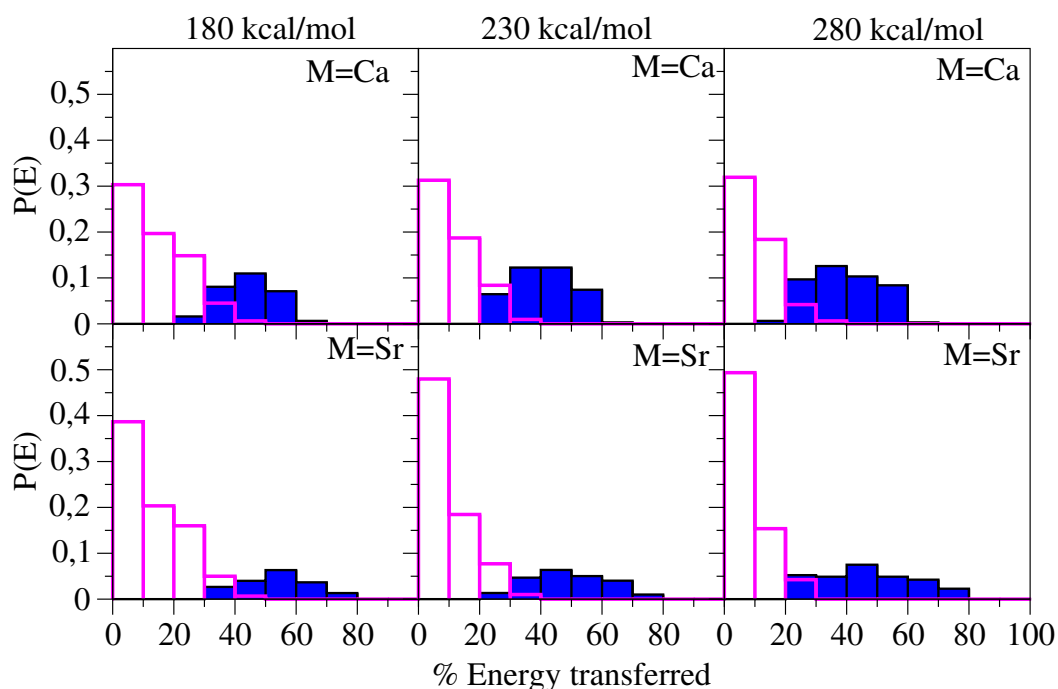

**Figure S6:** Probability of transferring a given % of the collision energy to the  $[M(\text{formamide})]^{2+}$  ion for the non-reactive trajectories (white) and the reactive ones (blue), at the three collision energies considered (180, 230 and 280 kcal mol<sup>-1</sup> from left to right). The trajectories were calculated using BLYP/6-31G(d) for M = Ca and G96LYP/6-31+G(d,p) for M = Sr.

In general the profiles are quite similar for both system, with a somewhat smaller percentages of transferred energy for Sr containing system in the case of the non-reactive trajectories, but higher for the reactive ones. In all the cases the most probable events are small energy transfers (between 0-10kcal mol<sup>-1</sup>). The probability of having a high percentage of energy transferred decreases progressively becoming zero for percentages higher than 70 % and 80% for Ca and Sr respectively. The reactive trajectories correspond to the highest amount of energy transferred, being the average for non-reactive about 13% and 44% for the reactive ones.

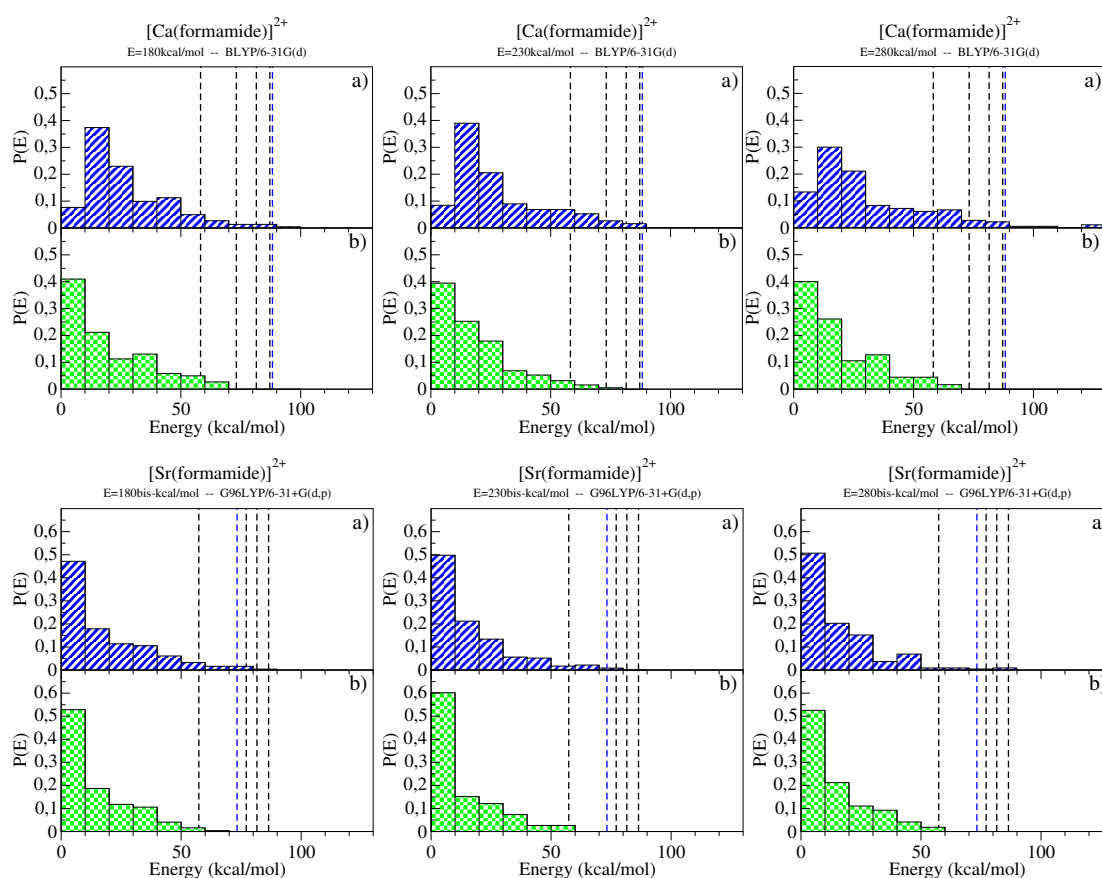

**Figure S7:** Vibrational (a panels) and rotational (b panels) energy distribution for the non-reactive trajectories at the three collision energies: 180, 230 and 280 kcal mol<sup>-1</sup> from left to right. The top panels correspond to M = Ca while the bottom ones are for M = Sr. The dashed lines marked the energy for the different TS that can be reached from min1 structure. The values for M = Ca are compute using the BLYP/6-31G(d) approach while the values for M = Sr are computed at the G96LYP/6-31+G(d,p) level of theory.

## Scattering plots for $[M(\text{formamide})]^{2+}$ ( $M = \text{Ca}, \text{Sr}$ )

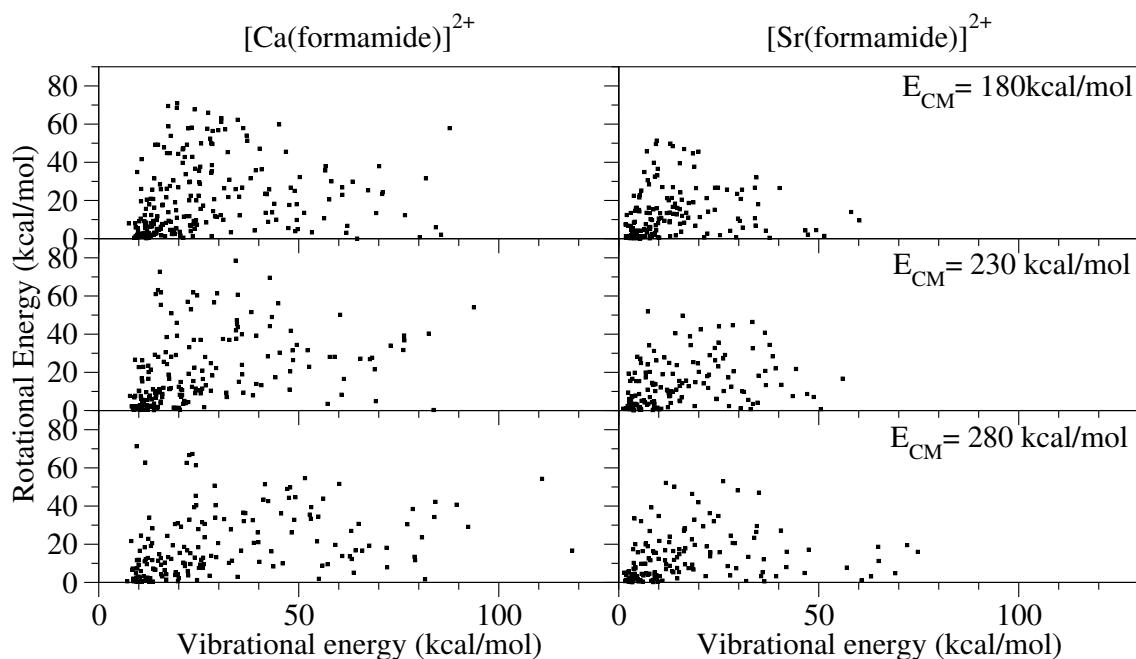

**Figure S8:** Scattering plot of vibrational versus rotational energy distributions obtained from nonreactive  $[M(\text{formamide})]^{2+}$  trajectories for the three collision energies considered. The level of theory used for both metals is: G96LYP/6-31G(d).

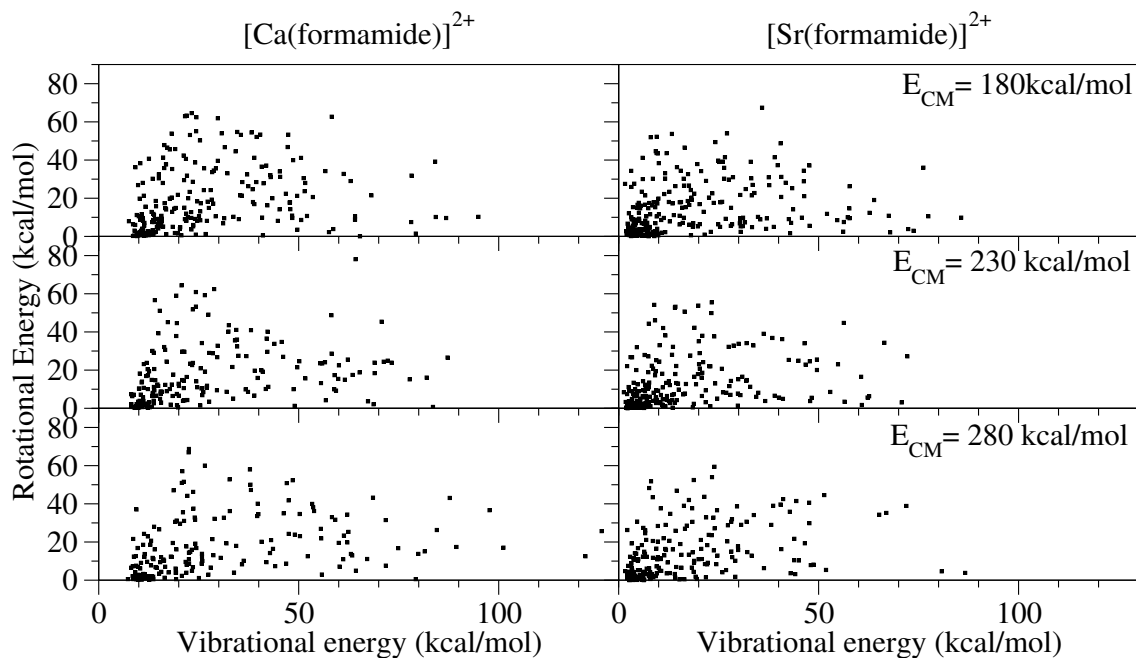

**Figure S9:** Scattering plot of vibrational versus rotational energy distributions obtained from nonreactive  $[M(\text{formamide})]^{2+}$  trajectories for the three collision energies. The trajectories were calculated using BLYP/6-31G(d) for  $M = \text{Ca}$  and G96LYP/6-31+G(d,p) for  $M = \text{Sr}$ .

Fig. S8 unambiguously show that vibrational excitation is independent from the rotational excitation. Similar results are obtained using BLYP/6-31G(d), M = Ca, and G96LYP/6-31+G(d,p), M = Sr, as shown in Fig. S9.

### Kinetic analysis:

Harmonic frequencies ( $\text{cm}^{-1}$ ) and energy threshold ( $\text{kcal mol}^{-1}$ ) used to compute the RRKM constants shown in this work.

### [Ca(formamide)]<sup>2+</sup>

➤ k<sub>1\_2</sub>

Threshold: 58.00 kcal mol<sup>-1</sup>

Harmonic frequencies ( $\text{cm}^{-1}$ )

Reactant

3539.3,3435.5,3075.0,1699.8,1596.0,1387.9,1353.4, 1076.1,1028.4, 718.4, 668.8, 587.8, 361.3, 136.9, 127.8

TS

3446.0,3162.0,1970.3,1668.8,1287.0,1103.2,1055.2, 1012.5, 939.9, 828.0, 751.4, 322.6, 148.0, 110.1

➤ k<sub>1\_10</sub>

Threshold: 74.00 kcal mol<sup>-1</sup>

Harmonic frequencies ( $\text{cm}^{-1}$ )

Reactant

3539.3,3435.5,3075.0,1699.8,1596.0,1387.9,1353.4, 1076.1,1028.4, 718.4, 668.8, 587.8, 361.3, 136.9, 127.8

TS

3368.0,3292.6,3214.0,2068.4,1583.2, 899.8, 828.6, 768.7, 441.2, 405.2, 386.5, 173.6, 137.1, 32.5

➤ k<sub>1\_G</sub>

Threshold: 82.00 kcal mol<sup>-1</sup>

Harmonic frequencies ( $\text{cm}^{-1}$ )

Reactant

3539.3,3435.5,3075.0,1699.8,1596.0,1387.9,1353.4, 1076.1,1028.4, 718.4, 668.8, 587.8, 361.3, 136.9, 127.8

TS

3441.8,3362.3,3144.2,2061.3,1580.2, 598.9, 590.5, 562.6, 471.4, 425.9, 232.9, 111.6, 80.6, 21.8



➤ k\_1\_5

Threshold: 87.00 kcal mol<sup>-1</sup>

Harmonic frequencies (cm<sup>-1</sup>)

Reactant

3539.3,3435.5,3075.0,1699.8,1596.0,1387.9,1353.4, 1076.1,1028.4, 718.4,  
668.8, 587.8, 361.3, 136.9, 127.8

TS

3391.7,3166.7,1941.0,1577.7,1504.3,1312.0,1053.2, 1013.5, 800.1, 544.1,  
515.0, 309.5, 115.9, 81.6

➤ k\_2\_1\_rrkm

Threshold: 9.00 kcal mol<sup>-1</sup>

Harmonic frequencies (cm<sup>-1</sup>)

Reactant

3436.3,3371.9,3098.4,1749.4,1331.7,1255.2,1019.0, 938.3, 798.1, 720.2, 634.8,  
595.9, 287.5, 137.5, 66.1

TS

3446.0,3162.0,1970.3,1668.8,1287.0,1103.2,1055.2, 1012.5, 939.9, 828.0,  
751.4, 322.6, 148.0, 110.1

➤ k\_2\_A\_rrkm

Threshold: 7.00 kcal mol<sup>-1</sup>

Harmonic frequencies (cm<sup>-1</sup>)

Reactant

3436.3,3371.9,3098.4,1749.4,1331.7,1255.2,1019.0, 938.3, 798.1, 720.2, 634.8,  
595.9, 287.5, 137.5, 66.1

TS

3667.9,3588.7,3218.7,2024.4,1141.1,1028.3, 796.1, 616.6, 544.9, 441.3, 388.3,  
228.2, 124.3, 42.7

➤ k\_2\_3\_rrkm

Threshold: 2.00 kcal mol<sup>-1</sup>

Harmonic frequencies (cm<sup>-1</sup>)

Reactant

3436.3,3371.9,3098.4,1749.4,1331.7,1255.2,1019.0, 938.3, 798.1, 720.2, 634.8,  
595.9, 287.5, 137.5, 66.1

TS

3513.3,3400.9,3104.9,1724.1,1291.6,1255.2,1043.0, 968.9, 814.0, 682.2, 600.2,  
364.9, 310.2, 148.0

➤ k\_3\_2\_rrkm

Threshold: 33.00 kcal mol<sup>-1</sup>

Harmonic frequencies (cm<sup>-1</sup>)

Reactant

3558.1,3435.8,3117.3,1653.5,1378.3,1279.1,1191.9, 1048.6, 997.6, 828.7,  
707.9, 478.8, 337.4, 275.1, 178.4

TS

3513.3,3400.9,3104.9,1724.1,1291.6,1255.2,1043.0, 968.9, 814.0, 682.2, 600.2,  
364.9, 310.2, 148.0

➤ k\_10\_11\_rrkm

Threshold: 0.00 kcal mol<sup>-1</sup>

Harmonic frequencies (cm<sup>-1</sup>)

Reactant

3375.2,3327.5,3108.4,2176.8,1701.7,1672.2,1454.4, 744.4, 660.6, 374.8, 300.9,  
159.5, 134.3, 134.2, 49.6

TS

3384.1,3345.7,3229.9,2174.6,1685.2,1668.7,1408.4, 690.2, 639.1, 370.9, 235.4,  
127.6, 123.3, 109.8

➤ k\_10\_1\_rrkm

Threshold: 45.00 kcal mol<sup>-1</sup>

Harmonic frequencies (cm<sup>-1</sup>)

Reactant

3375.2,3327.5,3108.4,2176.8,1701.7,1672.2,1454.4, 744.4, 660.6, 374.8, 300.9,  
159.5, 134.3, 134.2, 49.6

TS

3368.0,3292.6,3214.0,2068.4,1583.2, 899.8, 828.6, 768.7, 441.2, 405.2, 386.5,  
173.6, 137.1, 32.5

➤ k\_11\_10

Threshold: 16.00 kcal mol<sup>-1</sup>

Harmonic frequencies (cm<sup>-1</sup>)

Reactant

3378.0,3378.0,3302.4,2220.8,1676.1,1675.8,1422.6, 621.5, 620.7, 354.8, 211.1,  
211.1, 196.7, 17.9, 16.8

TS

3384.1,3345.7,3229.9,2174.6,1685.2,1668.7,1408.4, 690.2, 639.1, 370.9, 235.4,  
127.6, 123.3, 109.8

## [Sr(formamide)]<sup>2+</sup>

### ➤ k\_1\_2

Threshold: 54.00 kcal mol<sup>-1</sup>

Harmonic frequencies (cm<sup>-1</sup>)

Reactant

3557.6,3450.1,3043.6,1709.5,1608.7,1392.4,1341.3,1070.1,1030.0, 705.8,  
618.4, 576.4, 257.4, 125.6, 116.1

TS

3459.1,3157.6,1993.7,1657.5,1309.2,1123.1,1086.9, 1041.0, 952.2, 840.0,  
727.4, 226.3, 129.7, 102.5

### ➤ k\_1\_10

Threshold: 76.00 kcal mol<sup>-1</sup>

Harmonic frequencies (cm<sup>-1</sup>)

Reactant

3557.6,3450.1,3043.6,1709.5,1608.7,1392.4,1341.3, 1070.1,1030.0, 705.8,  
618.4, 576.4, 257.4, 125.6, 116.1

TS

3374.6,3301.3,3212.5,2038.9,1603.3, 912.7, 877.8, 784.1, 445.8, 410.7, 366.4,  
168.6, 135.9, 33.1

### ➤ k\_1\_G

Threshold: 88.16 kcal mol<sup>-1</sup>

Harmonic frequencies (cm<sup>-1</sup>)

Reactant

3557.6,3450.1,3043.6,1709.5,1608.7,1392.4,1341.3, 1070.1,1030.0, 705.8,  
618.4, 576.4, 257.4, 125.6, 116.1

TS

3461.2,3385.8,3050.4,2025.3,1609.9,659.0,521.8, 502.1, 410.3, 399.8, 208.1,  
108.8, 71.0, 19.8

### ➤ k\_1\_5

Threshold: 86.00 kcal mol<sup>-1</sup>

Harmonic frequencies (cm<sup>-1</sup>)

Reactant

3557.6,3450.1,3043.6,1709.5,1608.7,1392.4,1341.3, 1070.1,1030.0, 705.8,  
618.4, 576.4, 257.4, 125.6, 116.1

TS

3406.2,3178.3,1939.7,1572.0,1548.2,1306.7,1035.5, 984.1, 752.2, 524.4, 488.8,  
232.6, 104.7, 74.8

**Table S1:** Values of the RRKM rate constants,  $k(\text{s}^{-1})$ , for some selected energies,  $E$  ( $\text{kcal mol}^{-1}$ ). Rate constants adding one third of the total rotational energy,  $E_{\text{T}}(\text{rot})$ , to each of the rotational axis are marked with an asterisk,  $k^*$ .

**a) M = Ca.**  $E_{\text{T}}(\text{rot}) = 27 \text{ kcal mol}^{-1}$

| E   | $k_{01}$             | $k_{01}^*$           | $k_{12}$             | $k_{110}$            | $k_{110}^*$          | $k_{1G}$             | $k_{1G}^*$           | $k_{15}$          |
|-----|----------------------|----------------------|----------------------|----------------------|----------------------|----------------------|----------------------|-------------------|
| 45  | ---                  | ---                  | ---                  | ---                  | ---                  | ---                  | ---                  | ---               |
| 55  | $2.70 \cdot 10^5$    | ---                  | ---                  | ---                  | ---                  | ---                  | ---                  | ---               |
| 65  | $1.16 \cdot 10^8$    | ---                  | $1.90 \cdot 10^6$    | ---                  | ---                  | ---                  | ---                  | ---               |
| 75  | $1.65 \cdot 10^9$    | $3.98 \cdot 10^6$    | $7.22 \cdot 10^7$    | $1.75 \cdot 10^4$    | ---                  | ---                  | ---                  | ---               |
| 85  | $8.76 \cdot 10^9$    | $5.02 \cdot 10^8$    | $6.29 \cdot 10^8$    | $3.38 \cdot 10^7$    | ---                  | $3.99 \cdot 10^5$    | ---                  | ---               |
| 95  | $2.81 \cdot 10^{10}$ | $5.10 \cdot 10^9$    | $2.85 \cdot 10^9$    | $9.04 \cdot 10^8$    | $1.18 \cdot 10^5$    | $2.66 \cdot 10^8$    | $1.20 \cdot 10^6$    | $1.74 \cdot 10^5$ |
| 105 | $6.68 \cdot 10^{10}$ | $2.20 \cdot 10^{10}$ | $8.82 \cdot 10^9$    | $7.51 \cdot 10^9$    | $1.17 \cdot 10^8$    | $6.59 \cdot 10^9$    | $1.39 \cdot 10^9$    | $8.26 \cdot 10^6$ |
| 115 | $1.32 \cdot 10^{11}$ | $6.21 \cdot 10^{10}$ | $2.14 \cdot 10^{10}$ | $3.47 \cdot 10^{10}$ | $2.61 \cdot 10^9$    | $5.54 \cdot 10^{10}$ | $3.39 \cdot 10^{10}$ | $9.26 \cdot 10^7$ |
| 125 | $2.29 \cdot 10^{11}$ | $1.37 \cdot 10^{11}$ | $4.38 \cdot 10^{10}$ | $1.12 \cdot 10^{11}$ | $1.94 \cdot 10^{10}$ | $2.63 \cdot 10^{11}$ | $2.64 \cdot 10^{11}$ | $5.26 \cdot 10^8$ |

**b) M = Sr.**  $E_{\text{T}}(\text{rot}) = 18 \text{ kcal mol}^{-1}$

| E   | $k_{01}$             | $k_{01}^*$           | $k_{12}$             | $k_{110}$            | $k_{110}^*$          | $k_{1G}$             | $k_{1G}^*$           | $k_{15}$          |
|-----|----------------------|----------------------|----------------------|----------------------|----------------------|----------------------|----------------------|-------------------|
| 45  | $6.19 \cdot 10^5$    | ---                  | ---                  | ---                  | ---                  | ---                  | ---                  | ---               |
| 55  | $2.98 \cdot 10^8$    | ---                  | $3.24 \cdot 10^4$    | ---                  | ---                  | ---                  | ---                  | ---               |
| 65  | $3.80 \cdot 10^9$    | $4.71 \cdot 10^8$    | $1.72 \cdot 10^7$    | ---                  | ---                  | ---                  | ---                  | ---               |
| 75  | $1.84 \cdot 10^{10}$ | $6.70 \cdot 10^9$    | $2.85 \cdot 10^8$    | ---                  | ---                  | ---                  | ---                  | ---               |
| 85  | $5.60 \cdot 10^{10}$ | $3.18 \cdot 10^{10}$ | $1.73 \cdot 10^9$    | $5.65 \cdot 10^6$    | ---                  | ---                  | ---                  | ---               |
| 95  | $1.28 \cdot 10^{11}$ | $9.24 \cdot 10^{10}$ | $6.31 \cdot 10^9$    | $2.27 \cdot 10^8$    | $1.33 \cdot 10^6$    | $4.73 \cdot 10^6$    | ---                  | $5.84 \cdot 10^5$ |
| 105 | $2.40 \cdot 10^{11}$ | $2.00 \cdot 10^{11}$ | $1.69 \cdot 10^{10}$ | $2.25 \cdot 10^9$    | $1.39 \cdot 10^8$    | $5.56 \cdot 10^8$    | $8.62 \cdot 10^7$    | $2.31 \cdot 10^7$ |
| 115 | $3.96 \cdot 10^{11}$ | $3.66 \cdot 10^{11}$ | $3.69 \cdot 10^{10}$ | $1.15 \cdot 10^{10}$ | $1.88 \cdot 10^9$    | $8.90 \cdot 10^9$    | $4.28 \cdot 10^9$    | $2.40 \cdot 10^8$ |
| 125 | $5.99 \cdot 10^{11}$ | $5.89 \cdot 10^{11}$ | $6.98 \cdot 10^{10}$ | $3.98 \cdot 10^{10}$ | $1.12 \cdot 10^{10}$ | $6.13 \cdot 10^{10}$ | $4.75 \cdot 10^{10}$ | $1.30 \cdot 10^9$ |

## Intermediate 2 from [Ca(formamide)]<sup>2+</sup> and from [Sr(formamide)]<sup>2+</sup>:

The upper part of Fig. S10 shows the corresponding kinetic schemes for both metal ions. In the bottom part are represented the RRKM rate constants for the matching reactions.

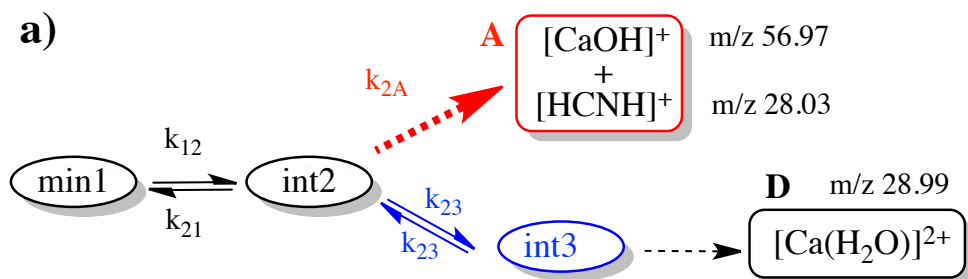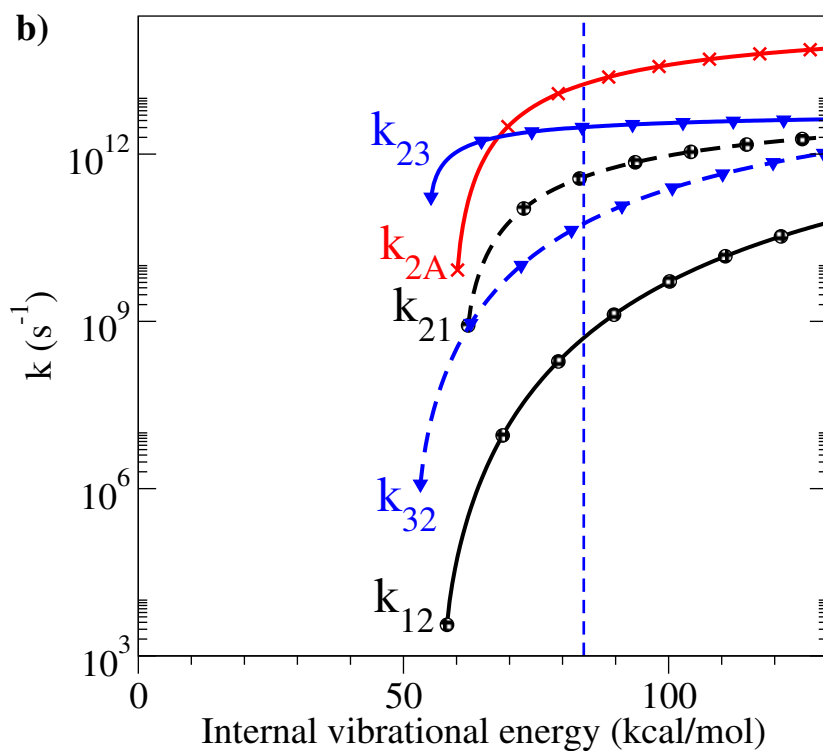

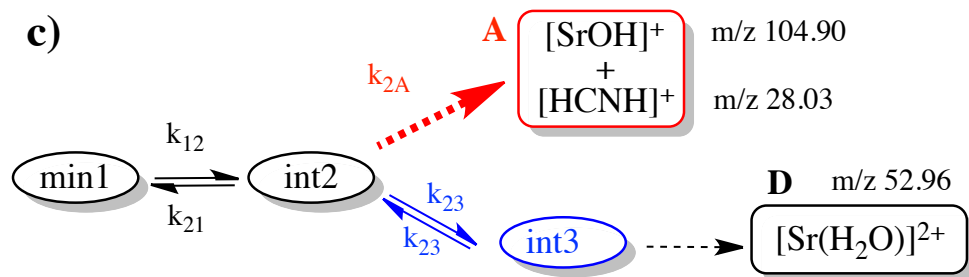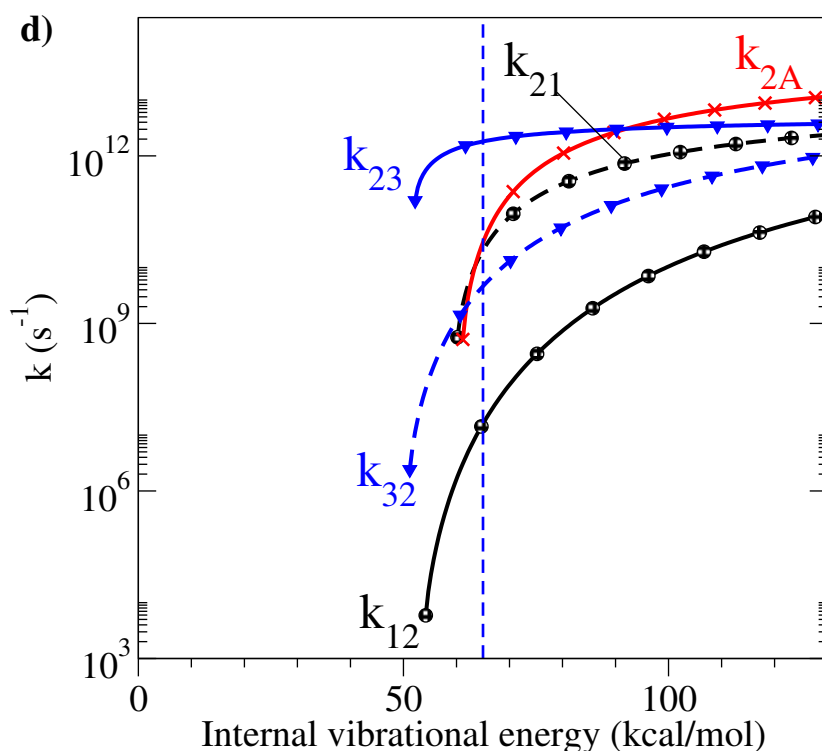

**Figure S10:** Upper part: kinetic scheme for the reactions that can take place starting from int2, a) M = Ca, c) M = Sr. In the bottom part are shown the corresponding RRKM rate constants.

From int2 there are three possible options: going back to the origin, min1; fragmentation of int2 via Coulomb explosion into products A, and an isomerization to int3 that would eventually lose ammonia to provide product D. For the sake of consistency, the curves were shifted to the left of a quantity corresponding to the relative energy of each intermediate with respect to min1. The first conspicuous observation is that for both Ca and Sr the backward reaction to min1 ( $k_{21}$ ) is faster than the forward one ( $k_{12}$ ); but reactions towards int3 ( $k_{23}$ ) and products A are even faster. There are, however, some subtle differences between the two metals as far as the reaction to A products is concerned. Whereas for M = Ca this reaction is much faster than the one going back to min1 and that yielding int3, for M = Sr it is slower than  $k_{23}$  and competes with  $k_{21}$ . Thus, for M = Ca, int2 would rapidly evolve to products A and a very small fraction would isomerize to int3, whereas for M = Sr most of the flux will follow the path leading to int3. In both cases this intermediate will eventually evolve to product D:  $[\text{M}(\text{H}_2\text{O})]^{2+}$  (M = Ca, Sr). Similar analyses have been performed for the intermediate int10 that eventually yields product B:  $[\text{Ca}(\text{NH}_3)]^{2+}$  (see Fig. S11).

### Intermediate 10 from $[\text{Ca}(\text{formamide})]^{2+}$ :

In the case of  $[\text{Ca}(\text{formamide})]^{2+}$  ion, a small fraction of the non-reactive ions has energy enough to follow the path leading to int10. This intermediate has two possible ways to evolve (see Fig. S11): either it comes back to min1 or it evolves to form product **B**. In this case, int10  $\rightarrow$  min1 backward reaction is slower than the forward, so once int10 is formed it will not interconvert back to products. From int10 there are two possible pathways to follow. A direct path from int10 to **B** or a path passing through int11, which can also evolve to product **B**. Between these two options the fastest is forming **B** directly from int10. Therefore, most of the flux will follow this path.

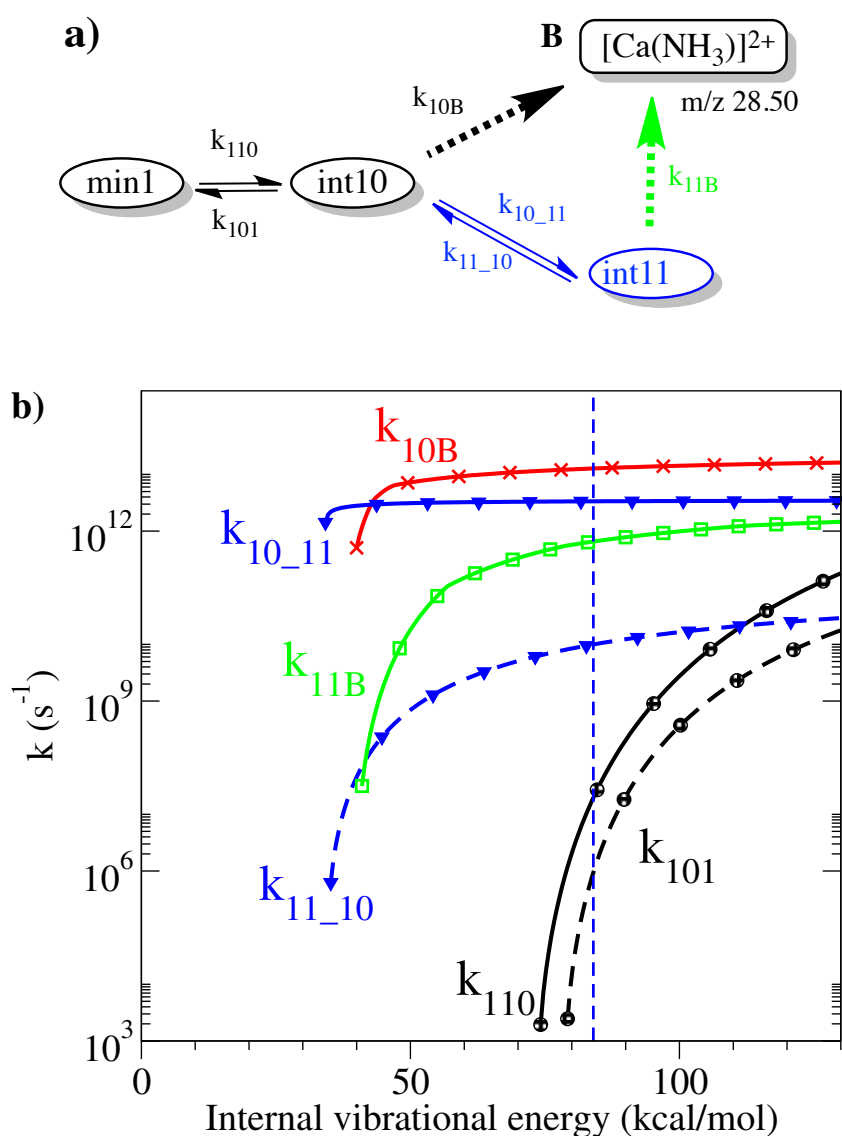

**Figure S11:** **a)** kinetic scheme for the reactions that can take place starting from int10, **b)** corresponding RRM rate constants, with (green lines) and without (black lines) rotational energy.
